# Supplementary material
Source: PubMed Central journal article supplement (PMC3275110)

Figure 2.

**A** ENPP1 protein in skeletal muscle

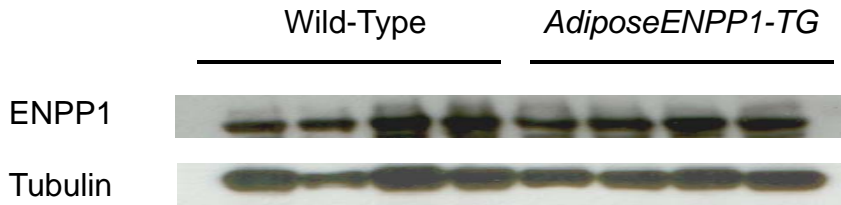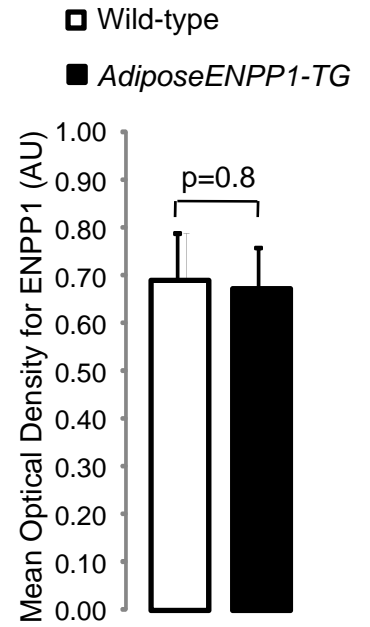

**B** Insulin receptor phosphorylation in skeletal muscle

Plasma insulin concentrations at the time of tissue collection (ng/mL)

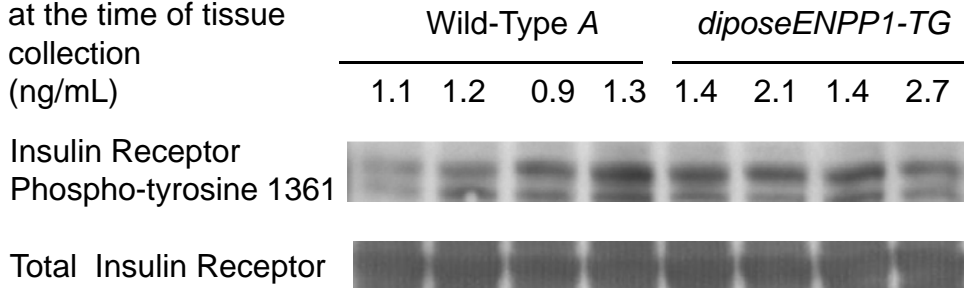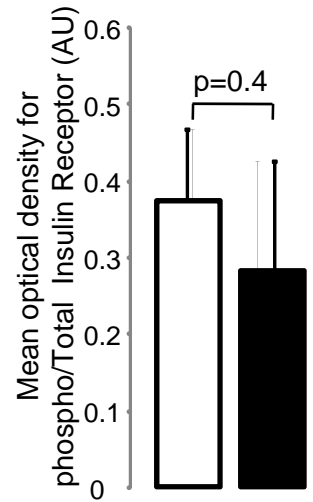

**C** Akt phosphorylation in skeletal muscle

Plasma insulin concentrations at the time of tissue collection (ng/mL)

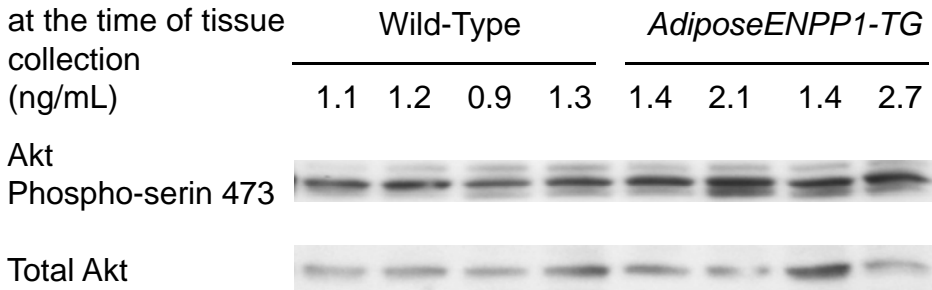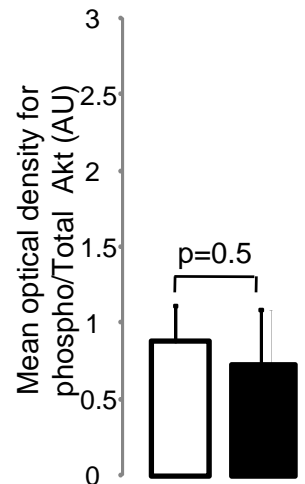

### Supplemental Figure 3.

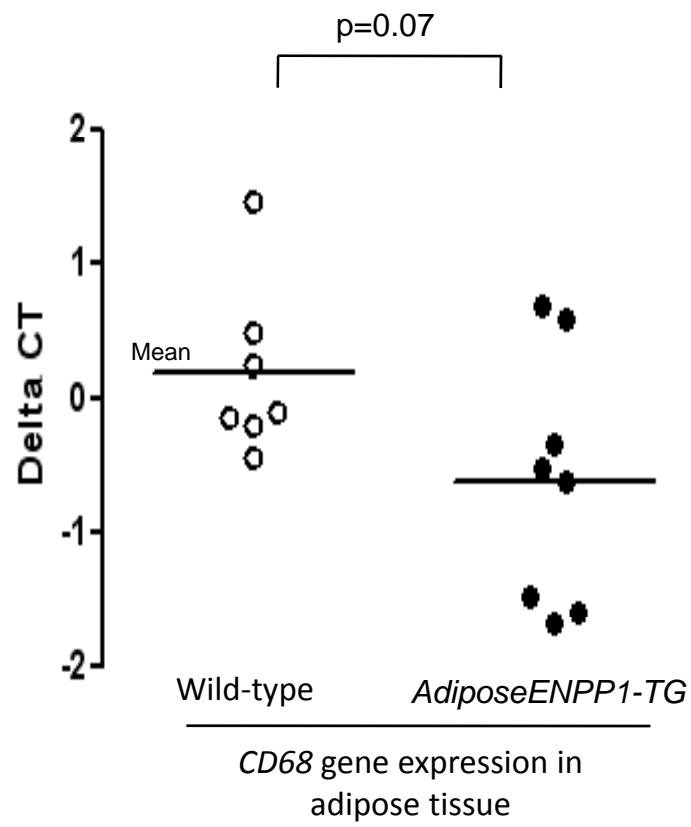

Supplement: supp_00087.2011_figs.pdf [file supp_00087.2011_figs.pdf]
